# Supplementary material for: Anuran genome size evolution is driven by relatively recent retrotransposon activity and by life history
Source: BMC Genomics. 2025 Dec 18;27:74. doi: 10.1186/s12864-025-12414-y (PMC12822217; doi:10.1186/s12864-025-12414-y)
Supplement: Supplementary file 1 — Supplementary Material 1. [file 12864_2025_12414_MOESM1_ESM.xlsx]

## Sheet: Table S1
Table S1: RepeatMasker summary table output for all 61 anuran genome assemblies.
Assembly.Accession	Species	Genome.size	Contig.N50	Filename	BEL.Pao.Count	BEL.Pao.Length..bp.	BEL.Pao.Percentage	CRE.SLACS.Count	CRE.SLACS.Length..bp.	CRE.SLACS.Percentage	DNA.transposons.Count	DNA.transposons.Length..bp.	DNA.transposons.Percentage	En.Spm.Count	En.Spm.Length..bp.	En.Spm.Percentage	Gypsy.DIRS1.Count	Gypsy.DIRS1.Length..bp.	Gypsy.DIRS1.Percentage	L1.CIN4.Count	L1.CIN4.Length..bp.	L1.CIN4.Percentage	L2.CR1.Rex.Count	L2.CR1.Rex.Length..bp.	L2.CR1.Rex.Percentage	LINEs.Count	LINEs.Length..bp.	LINEs.Percentage	LTR.elements.Count	LTR.elements.Length..bp.	LTR.elements.Percentage	MULE.MuDR.Count	MULE.MuDR.Length..bp.	MULE.MuDR.Percentage	Other..Mirage..Count	Other..Mirage..Length..bp.	Other..Mirage..Percentage	Penelope.Count	Penelope.Length..bp.	Penelope.Percentage	PiggyBac.Count	PiggyBac.Length..bp.	PiggyBac.Percentage	R1.LOA.Jockey.Count	R1.LOA.Jockey.Length..bp.	R1.LOA.Jockey.Percentage	R2.R4.NeSL.Count	R2.R4.NeSL.Length..bp.	R2.R4.NeSL.Percentage
GCA_022657655.1	Phrynoglossus myanhessei	1829122027	1468	GCA_022657655.1.csv	9620	1659110	0.09	18	2560	0	4249239	488000758	26.68	0	0	0	675922	109796112	6	161546	46475927	2.54	269783	38093802	2.08	497184	98287616	5.37	992142	151017199	8.26	4014	491504	0.03	37	3974	0	126247	17279151	0.94	114062	19695661	1.08	787	53023	0	9532	676999	0.04
GCA_040206685.1	Ascaphus truei	3722616900	981472	GCA_040206685.1.csv	10305	14983940	0.4	33	7631	0	5034531	1059476205	28.46	0	0	0	1850271	613131122	16.47	279607	133450776	3.58	553510	214598886	5.76	1149291	480887108	12.92	2539617	795562134	21.37	6970	2199857	0.06	46	34376	0	137979	25312056	0.68	8968	2569528	0.07	1141	378551	0.01	2040	287564	0.01
GCA_038048845.1	Mixophyes fleayi	2969628263	4050021	GCA_038048845.1.csv	3512	5727119	0.19	6	1592	0	3480374	665854366	22.42	0	0	0	931074	402631925	13.56	170942	57112659	1.92	474613	142758909	4.81	698009	221812950	7.47	1947436	690704509	23.26	4644	1468750	0.05	17	9099	0	47760	10134672	0.34	7885	618450	0.02	676	102074	0	2027	122952	0
GCF_014858855.1	Bufo gargarizans	4545465442	1738317	GCF_014858855.1.csv	37778	30344072	0.67	345	16628	0	3723361	1475970029	32.47	0	0	0	741126	453557902	9.98	248375	164318402	3.61	441988	133910866	2.95	790650	340123341	7.48	1079042	605649241	13.32	45760	11272646	0.25	497	66415	0	226967	119302548	2.62	195382	128708988	2.83	15330	3109790	0.07	1767	157385	0
GCA_042186555.1	Rana catesbeiana	6377618952	3396515	GCA_042186555.1.csv	74279	28487547	0.45	8	2279	0	7121220	2143284172	33.61	0	0	0	1532888	662515565	10.39	565395	441837689	6.93	647714	202001731	3.17	1376480	710500057	11.14	2435711	960824235	15.07	17464	6384619	0.1	161	37625	0	230008	85072098	1.33	167384	92411508	1.45	1510	411833	0.01	14198	1998029	0.03
GCA_037367395.1	Rana pipiens	5897899108	5395217	GCA_037367395.1.csv	66910	25846376	0.44	11	2307	0	7065261	1934933421	32.81	0	0	0	1597492	752994058	12.77	559212	375371605	6.36	615824	142606254	2.42	1313684	569289023	9.65	2449040	1015924305	17.23	16211	6453906	0.11	186	43039	0	153118	46300673	0.79	154990	67679023	1.15	2261	866540	0.01	18220	3892250	0.07
GCF_000935625.1	Nanorana parkeri	2053849526	32798	GCF_000935625.1.csv	21960	4337018	0.21	22	3163	0	2428580	433006146	21.08	0	0	0	392222	90800743	4.42	143069	61880416	3.01	262929	50199690	2.44	468925	124298539	6.05	676735	136603287	6.65	5958	1050053	0.05	55	10579	0	114407	22158716	1.08	37280	9065195	0.44	586	51150	0	11398	1076543	0.05
GCA_018994145.1	Leptobrachium ailaonicum	3535795546	821125	GCA_018994145.1.csv	34722	21563111	0.61	9	2832	0	2672313	707503622	20.01	0	0	0	546242	315176832	8.91	251504	143189270	4.05	1013371	293855732	8.31	1324966	454052663	12.84	900716	482395048	13.64	28442	9601074	0.27	133	62171	0	183727	64371924	1.82	36745	17995439	0.51	2949	939958	0.03	3018	496291	0.01
GCA_900303285.2	Rhinella marina	3473313001	860710	GCA_900303285.2.csv	9794	5851759	0.17	324	14455	0	3197472	1355548378	39.03	0	0	0	431988	172848214	4.98	175615	70815970	2.04	338648	121970075	3.51	585755	220116593	6.34	665228	241055245	6.94	48382	18224688	0.52	453	70261	0	112814	46790617	1.35	83121	20990980	0.6	19658	6247492	0.18	1584	148352	0
GCA_033119425.1	Bufotes viridis	3796774568	1872430	GCA_033119425.1.csv	27232	21360218	0.56	329	13792	0	4111915	1290216319	33.98	0	0	0	724841	304664188	8.02	194634	90828743	2.39	404139	121572825	3.2	704020	246137568	6.48	1057761	418998727	11.04	49149	11219482	0.3	464	65244	0	209099	85333782	2.25	160828	70692898	1.86	13985	2866364	0.08	1797	187316	0
GCA_024363595.1	Xenopus borealis	2747450723	21213	GCA_024363595.1.csv	6255	2312855	0.08	6	2245	0	4133102	674196360	24.54	0	0	0	488346	127983821	4.66	98470	31973937	1.16	527210	96910316	3.53	662786	137453526	5	878585	181502232	6.61	11726	2093518	0.08	16	1859	0	318591	54549415	1.99	45187	11497410	0.42	246	39565	0	1092	135912	0
GCA_031769625.1	Taudactylus pleione	5507797579	8853472	GCA_031769625.1.csv	26754	26800361	0.49	26	6740	0	8913056	1934634373	35.13	0	0	0	2142349	680194130	12.35	342531	113846739	2.07	407386	110055894	2	895908	294430629	5.35	2996545	1153186568	20.94	19420	17101212	0.31	82	41966	0	263181	55457464	1.01	23037	2821734	0.05	5266	1347052	0.02	3293	399160	0.01
GCF_000004195.4	Xenopus tropicalis	1451283599	14634335	GCF_000004195.4.csv	4285	3436010	0.24	10	8243	0	2248355	461921405	31.83	0	0	0	158303	51087482	3.52	58484	18175603	1.25	307511	64120834	4.42	397196	89612165	6.17	297718	80417618	5.54	1266	518318	0.04	44	20674	0	128275	24797024	1.71	36901	22364027	1.54	255	66425	0	1165	283368	0.02
GCA_036250615.1	Ptychadena robeensis	1591013924	12384	GCA_036250615.1.csv	20130	3228762	0.2	8	2149	0	3610813	484453993	30.45	0	0	0	823023	137162216	8.62	82032	26436519	1.66	154381	17601514	1.11	266169	50278529	3.16	1363777	208675025	13.12	2339	241022	0.02	37	2560	0	38786	4783469	0.3	81178	15719735	0.99	1788	211546	0.01	1543	99841	0.01
GCF_028390025.1	Pseudophryne corroboree	8872758793	6819095	GCF_028390025.1.csv	23403	13942729	0.16	8	2028	0	11432593	2844779903	32.06	0	0	0	2923397	2539041816	28.62	404929	166232494	1.87	786230	276753368	3.12	1458216	576306190	6.5	3971230	3076437415	34.67	40628	10406247	0.12	180	38398	0	227259	49012892	0.55	28898	3992000	0.04	2238	896504	0.01	5220	472190	0.01
GCA_037952835.1	Rana septentrionalis	7098362355	3139341	GCA_037952835.1.csv	114511	50431007	0.71	14	3291	0	8027783	2416143966	34.04	0	0	0	1540144	716714390	10.1	656285	501144259	7.06	691873	199451477	2.81	1559326	818808961	11.54	2573076	1057779269	14.9	20886	7555573	0.11	291	66856	0	238052	86802256	1.22	250566	112469339	1.58	2120	739420	0.01	16795	3659378	0.05
GCF_017654675.1	Xenopus laevis	2742451793	22451507	GCF_017654675.1.csv	20448	5550299	0.2	5	2914	0	4585520	914575771	33.35	0	0	0	353591	151427414	5.52	140463	58022282	2.12	505033	111029251	4.05	688128	181106775	6.6	627809	205105518	7.48	2636	615913	0.02	17	8345	0	355443	70638627	2.58	52939	31498087	1.15	325	70522	0	1710	228445	0.01
GCA_027410445.1	Discoglossus pictus	3872581802	3043591	GCA_027410445.1.csv	1683	941976	0.02	5	1885	0	6701078	1284635807	33.17	0	0	0	958334	256685440	6.63	368777	148001583	3.82	553314	227941395	5.89	1453393	536198563	13.85	1592894	445055886	11.49	3259	3165563	0.08	34	24856	0	53803	9002006	0.23	10494	1655173	0.04	643	151899	0	4218	304651	0.01
GCA_031893025.1	Leptodactylus fuscus	2307711212	5565655	GCA_031893025.1.csv	5883	5609431	0.24	263	14484	0	3984747	804816400	34.88	0	0	0	714720	208255150	9.02	105447	38418351	1.66	274294	69310757	3	436992	131765281	5.71	1173368	314415637	13.62	10403	4898763	0.21	218	27412	0	35836	8829316	0.38	24153	6540867	0.28	1888	397662	0.02	2082	171920	0.01
GCF_040937935.1	Hyperolius riggenbachi	4915935452	2674826	GCF_040937935.1.csv	8376	7160852	0.15	16	3838	0	10020113	2086349908	42.44	0	0	0	1862179	633339925	12.88	271965	83840365	1.71	551681	159996856	3.25	1043236	317097690	6.45	2813719	865202444	17.6	15095	5381111	0.11	288	119903	0	113274	31785910	0.65	89455	55760821	1.13	27511	7509595	0.15	29531	3707376	0.08
GCF_036172605.1	Pelobates fuscus	3606456729	29412599	GCF_036172605.1.csv	8496	2124264	0.06	20	2352	0	4773081	881874861	24.45	0	0	0	1163222	471125316	13.06	439701	174040453	4.83	539673	171457539	4.75	1113960	391529154	10.86	1904399	784283557	21.75	10960	3616666	0.1	29	5272	0	142166	39749399	1.1	52900	15269981	0.42	838	147468	0	12842	3900142	0.11
GCA_038501925.1	Xenopus petersii	2883778474	15294995	GCA_038501925.1.csv	24024	13235651	0.46	3	2898	0	4678632	969645807	33.62	0	0	0	437059	171370656	5.94	129814	59047086	2.05	524437	125653927	4.36	694863	198262175	6.88	794732	244204010	8.47	2638	893559	0.03	14	1880	0	358237	70899574	2.46	55233	37814627	1.31	349	106424	0	1936	206959	0.01
GCA_029215755.1	Spea hammondii	1155539324	14335781	GCA_029215755.1.csv	1651	1443621	0.12	5	2472	0	747222	208266194	18.02	0	0	0	143615	55226988	4.78	71744	40287092	3.49	276055	76647225	6.63	365321	122159058	10.57	226359	82577571	7.15	3523	507154	0.04	15	3263	0	36939	9974276	0.86	30779	11085637	0.96	816	164762	0.01	2163	427673	0.04
GCF_905171765.1	Bufo bufo	5044744194	3959750	GCF_905171765.1.csv	43612	40674575	0.81	320	14890	0	4072144	1575572709	31.23	0	0	0	830757	548317309	10.87	266930	177899104	3.53	473937	171349568	3.4	852612	402190301	7.97	1213153	750220550	14.87	50893	13005833	0.26	528	68473	0	257002	141847889	2.81	196979	125746182	2.49	18040	4489113	0.09	1830	181320	0
GCA_039654945.1	Dendrobates tinctorius	6355763190	32538637	GCA_039654945.1.csv	27622	24919453	0.39	271	13371	0	8451964	2595585758	40.84	0	0	0	2489847	1426103439	22.44	252831	87838690	1.38	689377	372959122	5.87	1130129	559924343	8.81	3316356	1692363742	26.63	20589	8223991	0.13	432	55754	0	145612	52026189	0.82	129538	49788441	0.78	5550	2367827	0.04	8151	3148596	0.05
GCA_027917425.1	Gastrophryne carolinensis	4336248441	4962642	GCA_027917425.1.csv	7802	6445994	0.15	20	2747	0	7413181	1450799260	33.46	0	0	0	2300848	1141005570	26.31	229993	110770419	2.55	331872	102559743	2.37	700312	267129199	6.16	2951629	1307201612	30.15	3262	1800877	0.04	88	60649	0	76160	16787208	0.39	17613	7232004	0.17	38848	11852304	0.27	3300	667392	0.02
GCA_043774495.1	Pseudacris regilla	3600278088	7148760	GCA_043774495.1.csv	8885	7366696	0.2	280	13886	0	6930607	1305341906	36.26	0	0	0	1239939	485208149	13.48	269900	118646714	3.3	453699	143935430	4	862182	322765588	8.96	1930543	652473912	18.12	14268	5427122	0.15	119	19049	0	135440	41768362	1.16	102937	33007597	0.92	2281	472071	0.01	2455	197914	0.01
GCA_009364415.1	Spea multiplicata	1075972709	30692	GCA_009364415.1.csv	2917	1027071	0.1	8	2640	0	759197	127082304	11.81	0	0	0	136398	39866907	3.71	82514	26069264	2.42	299721	50684337	4.71	405365	80888099	7.52	229020	58278022	5.42	1291	167563	0.02	9	866	0	42099	7719211	0.72	31829	7555918	0.7	564	71442	0.01	2195	436271	0.04
GCA_019650415.1	Pipa parva	1370893480	6215	GCA_019650415.1.csv	2980	807587	0.06	8	1980	0	2991870	384700289	28.06	0	0	0	374769	61803316	4.51	85076	15349919	1.12	308359	54996694	4.01	436206	79394416	5.79	672533	107129148	7.81	1809	265370	0.02	34	4520	0	50583	5658656	0.41	6076	806261	0.06	501	62778	0	1175	91931	0.01
GCA_029206835.1	Rana muscosa	10160103425	4644276	GCA_029206835.1.csv	77761	51311762	0.51	15	3135	0	8724507	3308241310	32.56	0	0	0	2712378	2451488836	24.13	602814	437111238	4.3	730058	164471782	1.62	1534917	696679843	6.86	3779412	2821193043	27.77	27696	9667336	0.1	215	104200	0	242695	94203745	0.93	165197	152008818	1.5	1847	458198	0	18945	4098741	0.04
GCA_009667805.1	Leptobrachium leishanense	3549060464	1946319	GCA_009667805.1.csv	36415	21700661	0.61	11	3429	0	2862878	761547736	21.46	0	0	0	583542	338119512	9.53	261350	138307405	3.9	1097585	322633261	9.09	1434149	482491390	13.59	948826	504708628	14.22	30877	10026193	0.28	112	32816	0	198055	63924656	1.8	42184	28464566	0.8	2941	791708	0.02	3150	478993	0.01
GCA_028564925.1	Rana sylvatica	5150352190	2498674	GCA_028564925.1.csv	52704	15974190	0.31	17	4030	0	6798486	1799356283	34.94	0	0	0	1224647	477698024	9.28	464197	284492636	5.52	567607	129161444	2.51	1161208	464665501	9.02	2042150	709445096	13.77	15370	5257485	0.1	174	44423	0	161344	54152600	1.05	123532	70140792	1.36	1334	243298	0	14262	2624400	0.05
GCA_951230385.1	Staurois parvus	3982222951	611229	GCA_951230385.1.csv	20114	12619217	0.32	950	98339	0	5539388	1297601754	32.58	0	0	0	1029459	324029404	8.14	311157	139072364	3.49	618379	185120288	4.65	1030646	355363574	8.92	1874425	527326998	13.24	7768	2593192	0.07	130	39169	0	111104	26800737	0.67	137370	59258539	1.49	1105	174277	0	6844	530384	0.01
GCA_933207985.1	Pelobates cultripes	3094940563	130439	GCA_933207985.1.csv	8159	2606209	0.08	12	1816	0	3936178	661104324	21.36	0	0	0	1105366	381932791	12.34	355259	130684402	4.22	633136	190283329	6.15	1098983	357081739	11.54	1937456	669665879	21.64	8690	1151746	0.04	33	7358	0	125674	31262280	1.01	42866	15983279	0.52	595	65276	0	11278	4056094	0.13
GCA_018402905.1	Glandirana rugosa	7628398632	11002	GCA_018402905.1.csv	46157	14751937	0.19	24	5212	0	9395160	2262031078	29.65	0	0	0	2078642	804300299	10.54	784353	467584112	6.13	750815	186694006	2.45	1792232	723410343	9.48	3214046	1075832016	14.1	20515	4018866	0.05	263	75986	0	240786	80308203	1.05	183938	86432744	1.13	2062	459989	0.01	19037	2742276	0.04
GCA_037306005.1	Rhinophrynus dorsalis	4745552136	12994863	GCA_037306005.1.csv	14803	5794376	0.12	7	2426	0	10050615	1656745780	34.91	0	0	0	2558420	872463944	18.38	297222	81524382	1.72	823467	253786955	5.35	1328087	390960490	8.24	3727312	1076190920	22.68	4458	1843195	0.04	3767	493832	0.01	163215	28762390	0.61	46824	19364444	0.41	4550	243093	0.01	2023	231471	0
GCA_033576555.1	Oophaga sylvatica	5186611867	97802	GCA_033576555.1.csv	18384	17175510	0.33	243	14039	0	5827393	1836003726	35.4	0	0	0	1865482	1575340553	30.37	141969	43547594	0.84	462582	191499808	3.69	826018	363691201	7.01	2531797	1814896835	34.99	12436	4103835	0.08	303	53160	0	131425	51365755	0.99	198926	136875876	2.64	2189	390931	0.01	6825	3471110	0.07
GCA_029574335.1	Rana kukunoris	4830730561	1704296	GCA_029574335.1.csv	44855	16000956	0.33	1965	488968	0.01	5982629	1533045159	31.74	0	0	0	1078209	488533300	10.11	430357	279933925	5.79	542167	143189804	2.96	1079661	465855141	9.64	1784733	700147245	14.49	23032	7932844	0.16	131	24994	0	154446	48409933	1	86056	38966582	0.81	1770	304336	0.01	17733	3200877	0.07
GCA_041080635.1	Atelopus laetissimus	3506202348	31028324	GCA_041080635.1.csv	9567	6520369	0.19	324	14163	0	4493479	1279071475	36.48	0	0	0	776710	292239667	8.33	188877	72239694	2.06	321295	114671317	3.27	591265	223715492	6.38	1171195	393852930	11.23	31814	15694937	0.45	798	130522	0	84559	22899882	0.65	122234	55372393	1.58	8870	2663118	0.08	1753	295748	0.01
GCA_016617825.1	Platyplectrum ornatum	1065311793	4707	GCA_016617825.1.csv	1251	292575	0.03	4	1844	0	1470224	153313384	14.39	0	0	0	179430	28248359	2.65	66164	12962358	1.22	118803	15246680	1.43	213052	34359183	3.23	290816	41053759	3.85	1108	136417	0.01	19	2025	0	20024	4042764	0.38	4792	503379	0.05	269	24635	0	1788	111746	0.01
GCA_041430395.1	Anaxyrus boreas	5278819005	2844713	GCA_041430395.1.csv	77515	165496962	3.14	348	17244	0	5248725	2076574344	39.34	0	0	0	870218	450506386	8.53	223916	125057361	2.37	410351	145775870	2.76	751565	325378584	6.16	1344248	772162966	14.63	63215	20861548	0.4	416	50657	0	185314	83296463	1.58	148544	62543908	1.18	25684	4085030	0.08	1937	192454	0
GCA_040894005.1	Engystomops pustulosus	2158203323	21805561	GCA_040894005.1.csv	11064	8298227	0.38	856	29956	0	1795425	505048073	23.4	0	0	0	370523	129925793	6.02	112343	48404820	2.24	278946	72337267	3.35	468727	156382398	7.25	637190	208535253	9.66	9323	5577973	0.26	33	7518	0	75791	26085099	1.21	26897	13870730	0.64	3714	2002233	0.09	3444	175040	0.01
GCA_025379985.1	Phyllomedusa bahiana	4741016426	78483	GCA_025379985.1.csv	62295	39240827	0.83	178	11342	0	6293291	1585635209	33.45	0	0	0	1805030	780088145	16.45	346072	139222146	2.94	443866	170895521	3.6	992369	393911423	8.31	3177044	1211453990	25.55	17389	3919090	0.08	198	30432	0	108772	32240331	0.68	27258	6235011	0.13	4111	1701940	0.04	2403	208011	0
GCA_021901965.1	Pipa carvalhoi	1192124124	1968	GCA_021901965.1.csv	3976	1042104	0.09	6	1915	0	2794216	341400902	28.64	0	0	0	410391	70362486	5.9	87014	17305599	1.45	302382	52934289	4.44	434826	79651192	6.68	631529	99858803	8.38	3869	473325	0.04	24	3433	0	46309	4804704	0.4	5272	1043507	0.09	628	69825	0.01	967	77405	0.01
GCA_036172795.1	Pelodytes ibericus	2077641644	19137354	GCA_036172795.1.csv	4016	4417885	0.21	11	7898	0	2923099	499949891	24.06	0	0	0	566867	151222138	7.28	247079	85089378	4.1	422301	110496822	5.32	743759	223046030	10.74	1017176	263959113	12.7	3432	1569740	0.08	36	14040	0	55895	8434493	0.41	94011	32236453	1.55	1633	975406	0.05	6188	1428361	0.07
GCA_027789725.1	Dendropsophus ebraccatus	2352801895	10560916	GCA_027789725.1.csv	5622	3138806	0.13	234	10811	0	4214845	675576192	28.71	0	0	0	984834	242201916	10.29	153250	63328660	2.69	328978	67748809	2.88	662588	168439191	7.16	1708096	406998952	17.3	17091	5835170	0.25	95	12367	0	43034	12521962	0.53	62670	28012101	1.19	1661	682487	0.03	1687	174022	0.01
GCA_009801035.1	Oophaga pumilio	3493380730	5836	GCA_009801035.1.csv	12352	4868812	0.14	188	10486	0	4638158	838392619	24	0	0	0	1005462	290951391	8.33	77224	18282458	0.52	282187	66274257	1.9	465556	116428553	3.33	1419765	377595598	10.81	7564	1233636	0.04	280	33207	0	63030	18904303	0.54	42961	10773725	0.31	2730	399478	0.01	5366	2444737	0.07
GCF_027579735.1	Bombina bombina	10019663791	3759931	GCF_027579735.1.csv	10243	8260846	0.24	13	4013	0	12198407	3011938266	90.23	0	0	0	3044807	2519846515	75.44	876224	379279818	11.35	605865	220296617	6.6	1967266	847813507	25.39	3910966	2875279388	86.06	10742	4202594	0.12	70	62732	0	443398	113184498	3.39	37343	19436368	0.58	896	273449	0	2963	259597	0
GCF_035609145.1	Eleutherodactylus coqui	3371297528	10388966	GCF_035609145.1.csv	35072	5380770	0.16	267	12860	0	5583798	1187176459	35.21	0	0	0	1158004	330713167	9.81	362572	122013969	3.62	525831	134232282	3.98	1059414	309811490	9.19	2391562	619399821	18.37	24217	6849353	0.2	140	39891	0	67555	12577908	0.37	50914	9158823	0.27	6859	863343	0.03	3505	797371	0.02
GCA_964205295.1	Bombina variegata	9369772323	1741680	GCA_964205295.1.csv	19970	12005155	0.13	8	6004	0	11748558	3002705049	32.05	0	0	0	3059305	2328797989	24.85	810259	311824536	3.33	593559	213231852	2.28	1898889	733958184	7.83	3897648	2649815768	28.28	10804	4269750	0.05	71	39044	0	361767	94388303	1.01	30546	16978263	0.18	1023	327532	0	3455	381811	0
GCF_029499605.1	Hyla sarda	4142159359	3809262	GCF_029499605.1.csv	11700	9398866	0.23	265	13447	0	7339545	1631563620	39.39	0	0	0	1485695	627577958	15.15	217151	88413655	2.13	464360	109962133	2.65	939681	304042571	7.34	2148088	788926125	19.05	13831	6712634	0.16	97	6981	0	179087	47144390	1.14	94484	24540369	0.59	1929	397519	0.01	3588	319138	0.01
GCA_036250195.1	Mixophyes australis	3127878685	10748000	GCA_036250195.1.csv	11915	9135638	0.29	5	7635	0	3546599	696196281	22.26	0	0	0	921625	405269875	12.96	272161	71302090	2.28	519018	139958509	4.47	847316	235154694	7.52	1986405	721902971	23.08	4357	1327897	0.04	25	7939	0	50741	11594165	0.37	9415	890202	0.03	522	134944	0	2108	124895	0
GCA_032444005.1	Ranitomeya imitator	5956610564	13907627	GCA_032444005.1.csv	37313	35952165	0.6	313	27385	0	8410326	2341772710	39.31	0	0	0	1933315	1234299329	20.72	172720	58382643	0.98	634591	318837400	5.35	1000839	466195603	7.83	2741012	1526539051	25.63	23871	10252822	0.17	454	152541	0	128984	44699816	0.75	178896	122453197	2.06	6035	1589409	0.03	11245	2004175	0.03
GCA_004786255.1	Pyxicephalus adspersus	1563367516	30445	GCA_004786255.1.csv	2061	673049	0.04	3	1439	0	929384	189847433	12.14	0	0	0	145793	42205476	2.7	79925	38674375	2.47	219912	42713848	2.73	316354	85525879	5.47	329251	78640719	5.03	1703	326700	0.02	8	658	0	27164	5123732	0.33	14178	5113590	0.33	196	18602	0	1009	70244	0
GCA_019447015.1	Hymenochirus boettgeri	3210867089	783846	GCA_019447015.1.csv	23530	4210261	0.13	16	5748	0	5903569	879068418	27.38	0	0	0	1075891	270351746	8.42	150473	52052454	1.62	566234	197314082	6.15	951706	308257953	9.6	1691031	411392536	12.81	8728	3172839	0.1	60	18658	0	252609	30996406	0.97	22656	10047092	0.31	462	146943	0	5048	566633	0.02
GCA_037952925.1	Rana clamitans	6355615356	4403197	GCA_037952925.1.csv	57407	22991520	0.36	16	2335	0	7252168	2108399196	33.17	0	0	0	1434008	611018669	9.61	581809	422672349	6.65	661112	194486601	3.06	1399638	674532603	10.61	2347380	893824105	14.06	19394	6876976	0.11	213	52183	0	233913	85169970	1.34	198255	97080571	1.53	1792	565041	0.01	16038	2936656	0.05
GCA_011038615.1	Limnodynastes dumerilii	2378679715	10550	GCA_011038615.1.csv	16485	3321352	0.14	9	2054	0	4845810	623189556	26.2	0	0	0	1137139	197959447	8.32	165431	52435963	2.2	333646	76865175	3.23	583280	154994738	6.52	1555029	269797703	11.34	6201	2063749	0.09	356	31206	0	71261	16391777	0.69	5647	430739	0.02	1523	204200	0.01	2217	147332	0.01
GCA_947044405.1	Leptodactylus fallax	2510271426	4630249	GCA_947044405.1.csv	18986	39549950	1.58	254	13328	0	3983757	797681393	31.78	0	0	0	697980	236227277	9.41	168835	80764617	3.22	251294	75526083	3.01	475497	191128340	7.61	1258775	452155844	18.01	8885	3986189	0.16	169	28475	0	36819	9380715	0.37	45329	13832619	0.55	2128	1854754	0.07	2332	241146	0.01
GCF_905171775.1	Rana temporaria	4111422596	6264810	GCF_905171775.1.csv	35278	13256434	0.32	2177	698153	0.02	4716107	1105396942	26.89	0	0	0	755635	320226436	7.79	325084	189535142	4.61	459172	107429602	2.61	862853	323847455	7.88	1273139	476500186	11.59	13677	3774347	0.09	136	40960	0	148888	60582322	1.47	60098	29059266	0.71	972	194054	0	13943	3012638	0.07
GCA_033576535.1	Allobates femoralis	5324439307	879094	GCA_033576535.1.csv	36154	23522564	0.44	281	16683	0	9245038	2117801211	39.78	0	0	0	2509213	869930517	16.34	335856	180768606	3.4	534183	219014101	4.11	1072450	477011931	8.96	3484254	1134547140	21.31	20126	6269686	0.12	493	66448	0	147966	42184944	0.79	68621	14836218	0.28	1780	312838	0.01	13643	2963463	0.06
GCF_027358695.1	Spea bombifrons	987655159	21170366	GCF_027358695.1.csv	1587	1326365	0.13	6	3169	0	678309	145197338	14.7	0	0	0	130706	43201856	4.37	62483	23588388	2.39	252179	45814472	4.64	330127	72612405	7.35	211904	64764304	6.56	1075	188633	0.02	11	4395	0	34273	14910784	1.51	24710	6206319	0.63	543	71678	0.01	1749	366351	0.04
[truncated: 46 more columns]

## Sheet: Table S2
Table S2: Minimum, maximum and mean clutch size data for 55 of the 61 anuran species.
Assembly.Accession	clutch.size.min	clutch.size.max	clutch.period.mean
GCF_017654675.1	2500	17000	9750
GCF_000004195.4	1000	3000	2000
GCA_042186555.1	20000	20000	20000
GCF_905171775.1	265	4000	2132.5
GCF_014858855.1	5000	7400	6200
GCA_037306005.1	265	5000	2632.5
GCA_040894005.1	140	330	235
GCF_905171765.1	5332	10000	7666
GCA_018994145.1	245	436	340.5
GCA_019447015.1	80	1047	563.5
GCA_004786255.1	3000	4000	3500
GCF_036172605.1	45	3000	1522.5
GCF_027358695.1	300	462	381
GCA_032444005.1	1	4	2.5
GCF_035609145.1	12	41	26.5
GCA_031893025.1	50	248	149
GCA_027917425.1	598	850	724
GCF_027579735.1	80	300	190
GCA_028564925.1	510	1433	971.5
GCA_964205295.1	45	170	107.5
GCA_933207985.1	2500	2500	2500
GCA_036172795.1	105	350	227.5
GCF_028390025.1	43	43	43
GCF_029499605.1	250	1000	625
GCA_027410445.1	20	1500	760
GCF_040937935.1	500	1000	750
GCA_009667805.1	295	436	365.5
GCA_029574335.1	265	2000	1132.5
GCA_040206685.1	28	96	62
GCA_029206835.1	223	223	223
GCA_038048845.1	120	1750	935
GCA_033119425.1	2000	30000	16000
GCA_900303285.2	4240	36100	20170
GCA_037952925.1	265	5500	2882.5
GCA_037367395.1	3045	8000	5522.5
GCA_039654945.1	2	16	9
GCA_043774495.1	265	807	536
GCA_041430395.1	5213	16500	10856.5
GCA_021901965.1	140	300	220
GCF_000935625.1	103	399	251
GCA_009801035.1	3	17	10
GCA_029215755.1	186	400	293
GCA_027789725.1	15	296	155.5
GCA_009364415.1	1070	1070	1070
GCA_041080635.1	386	386	386
GCA_031769625.1	22	22	22
GCA_947044405.1	26	43	34.5
GCA_037952835.1	500	2250	1375
GCA_033576535.1	8	48	28
GCA_951230385.1	14	26	20
GCA_033576555.1	2	6	4
GCA_018402905.1	400	1350	875
GCA_011038615.1	3550	3950	3750
GCA_019650415.1	186	186	186
GCA_016617825.1	645	1000	822.5

## Sheet: Table S3
Table S3: Minimum, maximum and mean larval period data for 39 of the 61 anuran species.
Assembly.Accession	larval.period.min	larval.period.max	larval.period.mean
GCF_000004195.4	28	42	35
GCA_042186555.1	730	1095	912.5
GCF_905171775.1	30	112	71
GCF_014858855.1	50	55	52.5
GCA_037306005.1	60	60	60
GCA_040894005.1	21	28	24.5
GCF_905171765.1	84	98	91
GCA_019447015.1	27	34	30.5
GCA_004786255.1	17	17	17
GCF_036172605.1	56	110	83
GCF_027358695.1	21	60	40.5
GCA_032444005.1	67	67	67
GCA_031893025.1	12	143	77.5
GCF_027579735.1	45	65	55
GCA_028564925.1	65	130	97.5
GCA_964205295.1	60	60	60
GCA_036172795.1	75	75	75
GCF_028390025.1	225	225	225
GCA_027410445.1	30	90	60
GCA_009667805.1	1095	1095	1095
GCA_029574335.1	30	30	30
GCA_040206685.1	365	1460	912.5
GCA_029206835.1	365	1460	912.5
GCA_038048845.1	180	540	360
GCA_033119425.1	21	25	23
GCA_900303285.2	14	28	21
GCA_037952925.1	365	730	547.5
GCA_037367395.1	68	86	77
GCA_039654945.1	60	90	75
GCA_041430395.1	28	45	36.5
GCA_009801035.1	42	56	49
GCA_029215755.1	56	56	56
GCA_027789725.1	28	42	35
GCA_009364415.1	7	9	8
GCA_947044405.1	42	57	49.5
GCA_037952835.1	365	730	547.5
GCA_033576535.1	40	50	45
GCA_951230385.1	104	104	104
GCA_033576555.1	42	56	49

## Sheet: Table S4
Table S4: Overlap of confidence intervals among internal nodes of the tree from ancestral character state reconstruction of genome size and TE content. See Supplemental Figure XX for reference to node labels. “TRUE” signifies overlap of confidence intervals, “FALSE” indicates non-overlap and what we interpret as a significant evolutionary transition between nodes.
Parent Node	Child Node	Genome Size	TE Percent	TE count	TE length
62	63	TRUE	TRUE	TRUE	TRUE
63	64	TRUE	TRUE	TRUE	TRUE
64	65	FALSE	TRUE	FALSE	FALSE
63	66	TRUE	TRUE	TRUE	TRUE
66	67	TRUE	TRUE	TRUE	TRUE
67	68	TRUE	TRUE	TRUE	TRUE
68	69	TRUE	TRUE	TRUE	TRUE
68	70	TRUE	TRUE	TRUE	TRUE
70	71	TRUE	TRUE	TRUE	TRUE
71	72	TRUE	TRUE	TRUE	TRUE
72	73	TRUE	TRUE	TRUE	TRUE
66	74	TRUE	TRUE	TRUE	TRUE
74	75	TRUE	TRUE	TRUE	TRUE
75	76	TRUE	TRUE	FALSE	TRUE
76	77	TRUE	TRUE	TRUE	TRUE
75	78	TRUE	TRUE	TRUE	TRUE
78	79	TRUE	TRUE	TRUE	TRUE
79	80	TRUE	TRUE	TRUE	TRUE
79	81	TRUE	TRUE	TRUE	TRUE
74	82	TRUE	TRUE	TRUE	TRUE
82	83	TRUE	TRUE	TRUE	TRUE
83	84	TRUE	TRUE	TRUE	TRUE
84	85	TRUE	TRUE	TRUE	TRUE
85	86	TRUE	TRUE	TRUE	TRUE
86	87	TRUE	TRUE	TRUE	TRUE
87	88	TRUE	TRUE	TRUE	TRUE
88	89	TRUE	TRUE	TRUE	TRUE
89	90	TRUE	TRUE	FALSE	TRUE
86	91	TRUE	TRUE	TRUE	TRUE
91	92	TRUE	TRUE	TRUE	TRUE
92	93	TRUE	TRUE	TRUE	TRUE
93	94	TRUE	TRUE	TRUE	TRUE
93	95	TRUE	TRUE	TRUE	TRUE
95	96	TRUE	TRUE	TRUE	TRUE
91	97	TRUE	TRUE	TRUE	TRUE
97	98	TRUE	TRUE	TRUE	TRUE
84	99	TRUE	TRUE	TRUE	TRUE
99	100	TRUE	TRUE	TRUE	TRUE
100	101	TRUE	TRUE	TRUE	TRUE
83	102	TRUE	TRUE	TRUE	TRUE
102	103	TRUE	TRUE	TRUE	TRUE
103	104	TRUE	TRUE	TRUE	TRUE
103	105	TRUE	TRUE	TRUE	TRUE
102	106	TRUE	TRUE	TRUE	TRUE
82	107	TRUE	TRUE	TRUE	TRUE
107	108	TRUE	TRUE	TRUE	TRUE
108	109	TRUE	TRUE	TRUE	TRUE
109	110	TRUE	TRUE	TRUE	TRUE
109	111	TRUE	TRUE	TRUE	TRUE
111	112	TRUE	TRUE	TRUE	TRUE
111	113	TRUE	TRUE	TRUE	TRUE
113	114	TRUE	TRUE	TRUE	TRUE
114	115	TRUE	TRUE	TRUE	TRUE
115	116	TRUE	TRUE	TRUE	TRUE
116	117	TRUE	TRUE	TRUE	TRUE
115	118	TRUE	TRUE	TRUE	TRUE
118	119	TRUE	TRUE	TRUE	TRUE
119	120	TRUE	TRUE	TRUE	TRUE
120	121	TRUE	TRUE	TRUE	TRUE
Supplemental Table 2. Overlap of confidence intervals among internal nodes of the tree from ancestral character state reconstruction of genome size and TE content. See Supplemental Figure XX for reference to node labels. “TRUE” signifies overlap of confidence intervals, “FALSE” indicates non-overlap and what we interpret as a significant evolutionary transition between nodes.

## Sheet: Table S5
Table S5: Coefficients from fitted Bayesian linear regression model between proportion of amphibian genome composed of recently active Ty3 elements and genome size. Elements were considered recently active if integrated genome sequence had less than 10% divergence from Ty3 RepeatModler consensus sequences. Estimated 𝜆 for the relationship was zero.
Coefficient	Estimate	Estimate Error	Lower 95% CI	Upper 95% CI
Intercept	-0.54	0.14	-0.8	-0.27
log10(Genome Size)	0.06	0.01	0.03	0.09

## Sheet: Table S6
Table S6: Count of Open Reading Frame Diamond BlastP Hits to Pol Polyprotein Components
species	Genome Size	pol_polyprotein_hit	protease_hit	integrase_hit	reverse_transcriptase_hit
Allobates_femoralis	5324439307	8438	0	1214	12
Anaxyrus_boreas	5278819005	973	16	22	538
Ascaphus_truei	3722616900	986	85	316	18
Atelopus_laetissimus	3506202348	119	3	0	279
Bombina_bombina	10020000000	1506	294	46	71
Bombina_variegata	9369772323	1350	286	240	236
Bufo_bufo	5044744194	6247	106	24	919
Bufo_gargarizans	4545465442	4858	26	15	660
Bufotes_viridis	3796774568	30575	7	9	474
Dendrobates_tinctorius	6355763190	16881	209	1387	548
Dendropsophus_ebraccatus	2352801895	1755	2	8	51
Discoglossus_pictus	3872581802	223	0	0	0
Eleutherodactylus_coqui	3371297528	595	28	25	59
Engystomops_pustulosus	2158203323	2544	4	2	7
Gastrophryne_carolinensis	4336248441	1161	0	8	2
Glandirana_rugosa	7628398632	728	0	30	24
Hyla_sarda	4142159359	470	215	1	7
Hymenochirus_boettgeri	3210867089	175	1	0	1
Hyperolius_riggenbachi	4915935452	293	23	12	23
Leptobrachium_ailaonicum	3535795546	5977	474	570	315
Leptobrachium_leishanense	3549060464	11250	763	675	319
Leptodactylus_fallax	2510271426	2781	29	1165	88
Leptodactylus_fuscus	2307711212	749	14	2	6
Limnodynastes_dumerilii	2378679715	45	1	40	35
Mixophyes_australis	3127878685	869	108	10	128
Mixophyes_fleayi	2969628263	3085	175	16	158
Nanorana_parkeri	2053849526	33	2	2	6
Oophaga_pumilio	3493380730	12	3	0	2
Oophaga_sylvatica	5186611867	14507	60	3496	371
Pelobates_cultripes	3094940563	4993	81	12	27
Pelobates_fuscus	3606456729	3929	72	17	35
Pelodytes_ibericus	2077641644	1022	2	17	16
Phyllomedusa_bahiana	4741016426	3610	76	14	200
Pseudacris_regilla	3600278088	12189	0	3	74
Pseudophryne_corroboree	8872758793	4320	1571	38	198
Ptychadena_robeensis	1591013924	22	0	0	0
Pyxicephalus_adspersus	1563367516	58	3	4	5
Lithobates_catesbeiana	6377618952	787	4	43	35
Lithobates_clamitans	6355615356	772	10	65	27
Rana_kukunoris	4830730561	3006	11	38	343
Rana_muscosa	10160000000	36686	641	2142	317
Lithobates_pipiens	5897899108	5938	3	30	12
Lithobates_septentrionalis	7098362355	1863	2	74	30
Lithobates_sylvatica	5150352190	3624	139	498	8
Rana_temporaria	4111422596	1343	9	16	14
Ranitomeya_imitator	5956610564	3164	135	36	6
Rhinella_marina	3473313001	984	7	7	304
Rhinophrynus_dorsalis	4745552136	1874	305	31	104
Spea_bombifrons	987655159	352	11	52	8
Spea_hammondii	1155539324	360	29	10	5
Spea_multiplicata	1075972709	151	23	8	2
Staurois_parvus	3982222951	1202	17	39	147
Taudactylus_pleione	5507797579	4780	1	32	1
Xenopus_borealis	2747450723	54	1	3	7
Xenopus_laevis	2742451793	1063	29	51	61
Xenopus_petersii	2883778474	1042	30	18	63
Xenopus_tropicalis	1451283599	151	3	38	12
Phrynoglossus_myanhessei	1829122027	0	0	0	0
Platyplectrum_ornatum	1065311793	0	0	0	0

## Sheet: Table S7
Table S7: Coefficients from fitted Bayesian negative binomial regression model between count of open reading frame (ORF) blastp hits to retroviral Pol polyprotein from putatively full length Ty3 elements and genome size. Elements were considered full length if they were greater than 90% of the RepeatModeler consensus sequence and greater than 4,000 bp. Count includes ORFs that were identified as …
Coefficient	Estimate	Estimate Error	Lower 95% CI	Upper 95% CI
𝛌	0.12	0.04	0.06	0.2
Intercept	-55.5	12.21	-80.1	-32
log10(Genome Size)	6.55	1.27	4.12	9.11

## Sheet: Table S8
Table S8: Summary of Phylogenetic Generalized Least Squares test when using proportion of GC content as the response variable, with genome size, proportion of transposable elements, and contig N50 as the predictor.
Variable	Value	Std.Error	t-value	p-value	q-value
(Intercept)	37.6745	0.713914	52.7718	4.37637e-50	1.75055e-49
Genome_size_Gb	0.169314	0.0887573	1.90761	0.0614846	0.0819795
total.TEs.percentage_final	0.0553077	0.00382665	14.4533	1.02467e-20	2.04935e-20
Assembly.Stats.Contig.N50	1.60862e-08	1.13518e-08	1.41706	0.161909	0.161909
Lambda = 1.025328

## Sheet: Table S9
Table S9: Summary of Phylogenetic Generalized Least Squares test when using proportion of GC content as the response variable, with genome size, number of transposable element insertions, and contig N50 as the predictor.
Variable	Value	Std.Error	t-value	p-value	q-value
(Intercept)	39.4161	1.00903	39.0636	1.77465e-33	3.73e-32
Genome_size_Gb	-0.353758	0.285967	-1.23706	0.223279	0.555619
SINEs.Count	-1.95385e-06	3.0804e-06	-0.634285	0.529506	0.81763
Penelope.Count	-2.3264e-06	4.52682e-06	-0.513915	0.610139	0.81763
CRE.SLACS.Count	0.000640006	0.000331303	1.93179	0.0604915	0.254064
L2.CR1.Rex.Count	6.91927e-07	1.87493e-06	0.369041	0.714044	0.81763
R1.LOA.Jockey.Count	4.01792e-05	3.35498e-05	1.1976	0.238122	0.555619
R2.R4.NeSL.Count	7.42798e-05	4.9949e-05	1.48711	0.144825	0.434476
RTE.Bov.B.Count	-1.52088e-06	6.55219e-06	-0.232117	0.81763	0.81763
L1.CIN4.Count	-1.00108e-06	2.18991e-06	-0.457134	0.650048	0.81763
Gypsy.DIRS1.Count	2.25486e-06	7.38645e-07	3.0527	0.0040196	0.042206
BEL.Pao.Count	-3.87337e-06	8.47546e-06	-0.45701	0.650136	0.81763
Ty1.Copia.Count	-1.49466e-06	3.33494e-06	-0.448183	0.656439	0.81763
Retroviral.Count	1.29008e-06	3.1577e-06	0.40855	0.685049	0.81763
hobo.Activator.Count	-1.49957e-07	5.91594e-07	-0.253479	0.801196	0.81763
Tc1.IS630.Pogo.Count	2.40986e-07	8.65696e-07	0.278373	0.78216	0.81763
MULE.MuDR.Count	4.92973e-05	2.69853e-05	1.82682	0.0751961	0.263186
PiggyBac.Count	5.67803e-06	2.58442e-06	2.19702	0.0338731	0.237112
Tourist.Harbinger.Count	7.95083e-07	2.34324e-06	0.33931	0.736151	0.81763
Other..Mirage..Count	-0.000337561	0.000564726	-0.597744	0.55338	0.81763
Assembly.Stats.Contig.N50	2.87282e-08	1.40682e-08	2.04207	0.0477766	0.250827
Lambda = 1.025328

## Sheet: Table S10
Table S10: Summary of Phylogenetic Generalized Least Squares test when using proportion of GC content as the response variable, with genome size, length of transposable elements, and contig N50 as the predictor.
Variable	Value	Std.Error	t-value	p-value	q-value
(Intercept)	40.2054	1.07287	37.4747	8.94852e-33	1.87919e-31
Genome_size_Gb	-0.566589	0.482003	-1.17549	0.246749	0.826281
SINEs.Length..bp.	5.6237e-09	7.76801e-09	0.723957	0.473305	0.826281
Penelope.Length..bp.	1.69263e-09	1.14326e-08	0.148053	0.883045	0.970001
CRE.SLACS.Length..bp.	2.53254e-06	1.45131e-06	1.745	0.088664	0.620648
L2.CR1.Rex.Length..bp.	1.8961e-09	4.00648e-09	0.473259	0.638601	0.826281
R1.LOA.Jockey.Length..bp.	2.1773e-07	1.13134e-07	1.92453	0.0614215	0.620648
R2.R4.NeSL.Length..bp.	1.42976e-07	1.99353e-07	0.717198	0.477419	0.826281
RTE.Bov.B.Length..bp.	5.09663e-09	1.80893e-08	0.281747	0.77959	0.909521
L1.CIN4.Length..bp.	3.22323e-09	4.02168e-09	0.801463	0.427599	0.826281
Gypsy.DIRS1.Length..bp.	5.23745e-10	8.67597e-10	0.603673	0.549469	0.826281
BEL.Pao.Length..bp.	-3.62336e-09	6.01608e-09	-0.60228	0.550387	0.826281
Ty1.Copia.Length..bp.	7.11598e-09	1.06686e-08	0.667002	0.5086	0.826281
Retroviral.Length..bp.	7.49568e-09	4.97172e-09	1.50766	0.139499	0.73237
hobo.Activator.Length..bp.	1.31285e-09	1.50064e-09	0.874858	0.386874	0.826281
Tc1.IS630.Pogo.Length..bp.	9.19695e-11	2.43032e-09	0.0378426	0.970001	0.970001
MULE.MuDR.Length..bp.	3.09513e-08	6.93707e-08	0.446173	0.657878	0.826281
PiggyBac.Length..bp.	3.15326e-09	7.31879e-09	0.430844	0.668894	0.826281
Tourist.Harbinger.Length..bp.	4.56809e-10	4.81594e-09	0.0948536	0.924905	0.970001
Other..Mirage..Length..bp.	2.83669e-06	4.00476e-06	0.708329	0.482849	0.826281
Assembly.Stats.Contig.N50	7.81554e-09	1.40379e-08	0.556745	0.580803	0.826281
Lambda = 1.025328

[truncated: 7 more sheets: Table S11, Table S12, Table S13, Table S14, Table S15, Table S16, Table S17]
